# Supplementary material
Source: publisher figshare collection journal article supplement (https://tandf.figshare.com/ndownloader/files/31581004)
Supplement: Supplementary file 1 [file 31581004]

**Phosphorus-nitrogen compounds. Part 58. Syntheses, structural characterizations and biological activities of the fully substituted cyclotriphosphazenes bearing (4-fluorobenzyl)spiro(N/O) pendant arm**

Arzu Binicia, Gamze Elmasb,*, Aytuğ Okumuş b,*, Seçil Erden Tayhanc, Tuncer Hökelekd, Büşra Nur Şekere, Leyla Açıke, Zeynel Kılıçb

**a** Republic of Turkey, Ministry of Health, 06100 Ankara, Turkey

**b** Department of Chemistry, Ankara University, 06100 Ankara, Turkey

c Department of Bioengineering, Tokat Gaziosmanpaşa University, 60240 Tokat, Turkey

d Department of Physics, Hacettepe University, 06800 Ankara, Turkey

e Department of Biology, Gazi University, 06500 Ankara, Turkey

**SUPPLEMENTAL MATERIAL**

| **Table S1.** Selected interatomic distances of **2** (Å)…………………………………………………………………….. | **3** |
| --- | --- |
| **Figure S1.** View of the three-dimensional Hirshfeld surface of **2** plotted over dnorm in the range of -0.0554 to 1.2543 a.u.………..………………………………………………………………………………………………………... | **4** |
| **Figure S2.** View of the three-dimensional Hirshfeld surface of **2** plotted over electrostatic potential energy in the range -0.0500 to 0.0500 a.u. using the STO-3 G basis set at the Hartree–Fock level of theory. Hydrogen-bond donors and acceptors are shown as blue and red regions around the atoms corresponding to positive and negative potentials, respectively.………………………………………………………………………………………… | **5** |
| **Figure S3.** Hirshfeld surface of **2** plotted over shape-index…………….……………………………………………. | **6** |
| **Figure S4.** The full two-dimensional fingerprint plots for **2**, showing (a) all interactions, and delineated into (b) H ... Cl/Cl ... H, (c) H ... H, (d) H ... N/ N ... H, (e) H ... F/F ... H, (f) Cl ... Cl, (g) H ... O/O … H, (h) N ... Cl/Cl ... N, (i) C … Cl/Cl … C, (j) H … C/C … H, (k) F … Cl/Cl … F and (l) F … C/ C … F interactions. The di and de values are the closest internal and external distances (in Å) from given points on the Hirshfeld surface contacts…………………………………………………………………………………………………………………….. | **7** |
| **Figure S5.** The shapes of the phosphazene rings in **2** with torsion angles (deg) given…………………………... | **8** |
| **Figure S6.** The conformations of (**a**) the trimer ring and (**b**) the spiro ring of **2**……………………………………. | **9** |
| **Figure S7.** The Hirshfeld surface representations with the function dnorm plotted onto the surface for **(a)** H ... Cl/Cl ... H, **(b)** H ... H, **(c)** H ... N/ N ... H and **(d)** H ... F/F ... H interactions.…………...…………………………... | **10** |
| **Figure S8.** The packing diagram of **2**…………………………………………………………………………………… | **11** |
| **Figure S9.** Antiproliferative effects of phosphazenes (**2a-2d**) and 5-Fu (positive control) on PC3 cell lines at various concentrations (640–20 µM) and incubation times (24-48 h). All values are normalized to control untreated cells and presented as mean ± SD (n ≥ 3). Results were analyzed using ANOVA test; **** p ≤ 0.0001, *** p ≤ 0.0005, ** p ≤ 0.01, * p ≤ 0.05…………………………………………………………………… | **12** |
| **Figure S10.** Antiproliferative effects of phosphazenes (**2a-2d**) and 5-Fu (positive control) on MCF7 cell lines at various concentrations (640–20 µM) and incubation times (24-48 h). All values are normalized to control untreated cells and presented as mean ± SD (n ≥ 3). Results were analyzed using ANOVA test; **** p ≤ 0.0001, *** p ≤ 0.0005, ** p ≤ 0.01, * p ≤ 0.05…………………………………………………………………… | **13** |
| **Figure S11.** Antiproliferative effects of phosphazenes (**2a-2d**) and 5-Fu (positive control) on HT29 cell lines at various concentrations (640–20 µM) and incubation times (24-48 h). All values are normalized to control untreated cells and presented as mean ± SD (n ≥ 3). Results were analyzed using ANOVA test; **** p ≤ 0.0001, *** p ≤ 0.0005, ** p ≤ 0.01, * p ≤ 0.05…………………………………………………………………… | **14** |
| **Figure S12.** Antimigrative effects of **2a-2d** on breast cancer cell lines (MCF7). Photographs were taken by Olympus Inverted Microscope (magnification is 4X) and processed by ImageJ image processing program……... | **15** |
| **Figure S13.** Antimigrative effects of **2a-2d** on colon cancer cell lines (HT29). Photographs were taken by Olympus Inverted Microscope (magnification is 4X) and processed by ImageJ image processing program……... | **16** |
|  |  |
|  |  |
|  |  |

**Table S1**

Selected interatomic distances of **2** (Å).

| Cl1···Cl3i | 3.6968 (10) | F1···H9Avii | 2.79 |
| --- | --- | --- | --- |
| Cl1···C3i | 3.580 (3) | H2···O1viii | 2.72 |
| Cl2···Cl4ii | 3.5345 (9) | C9···N3ix | 3.363 (3) |
| Cl2···Cl3iii | 3.6810 (11) | N3···H7B | 2.74 |
| C8···Cl4iv | 3.516 (2) | H10A···N3ix | 2.94 |
| F1···Cl4v | 3.216 (3) | N4···H2 | 2.81 |
| Cl1···H8Avi | 3.13 | C1···C6vii | 3.306 (4) |
| Cl1···H7Bi | 3.12 | C1···C1vii | 3.556 (4) |
| H5···Cl2iv | 3.07 | C6···C6vii | 3.596 (5) |
| H5···Cl3v | 3.12 | C1···H9Bx | 2.85 |
| H8B···Cl4iv | 2.87 | C3···H8B | 2.66 |
| F1···C1vii | 3.352 (4) | H1···H9Bx | 2.39 |
| F1···C2vii | 3.286 (4) | H4···H7A | 2.34 |
| F1···C8vii | 3.356 (3) | H7A···H8A | 2.53 |
| F1···C9vii | 3.370 (3) | H8A···H10B | 2.54 |
| F1···H8Bvii | 2.67 |  |  |

Symmetry codes: (i) −*x*+2, −*y*+1, −*z*+1; (ii) −*x*+3/2, *y*−1/2, −*z*+1/2; (iii) *x*, *y*−1, *z*; (iv) *x*+1/2, −*y*+1/2, *z*+1/2; (v) *x*+1/2, −*y*+3/2, *z*+1/2; (vi) −*x*+2, −*y*, −*z*+1; (vii) −*x*+3, −*y*+1, −*z*+1; (viii) −*x*+5/2, *y*+1/2, −*z*+1/2; (ix) −*x*+5/2, *y*−1/2, −*z*+1/2; (x) *x*, *y*+1, *z*.


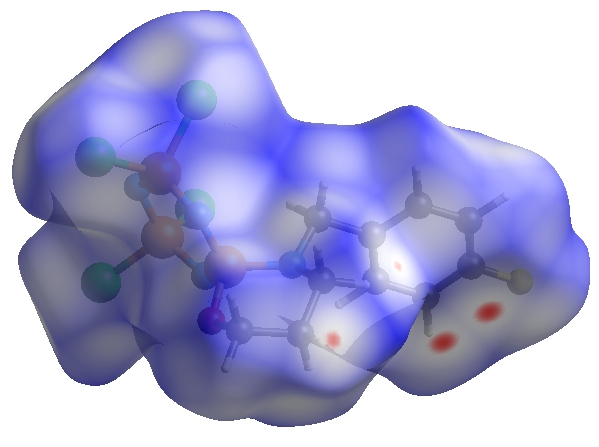


**Figure S1.** View of the three-dimensional Hirshfeld surface of **2** plotted over dnorm in the range of -0.0554 to 1.2543 a.u.

|  |
| --- |
|  |

| 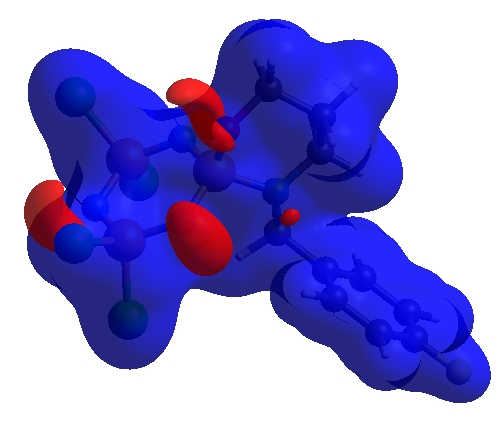  **Figure S2.** View of the three-dimensional Hirshfeld surface of 2 plotted over electrostatic potential energy in the range -0.0500 to 0.0500 a.u. using the STO-3 G basis set at the Hartree–Fock level of theory. Hydrogen-bond donors and acceptors are shown as blue and red regions around the atoms corresponding to positive and negative potentials, respectively. |
| --- |
|  |

| 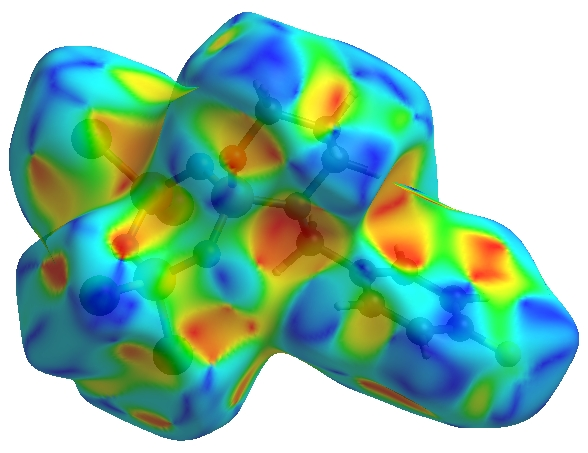 |
| --- |
| **Figure S3.** Hirshfeld surface of the compound **2** plotted over shape-index. |

|  |
| --- |
|  |


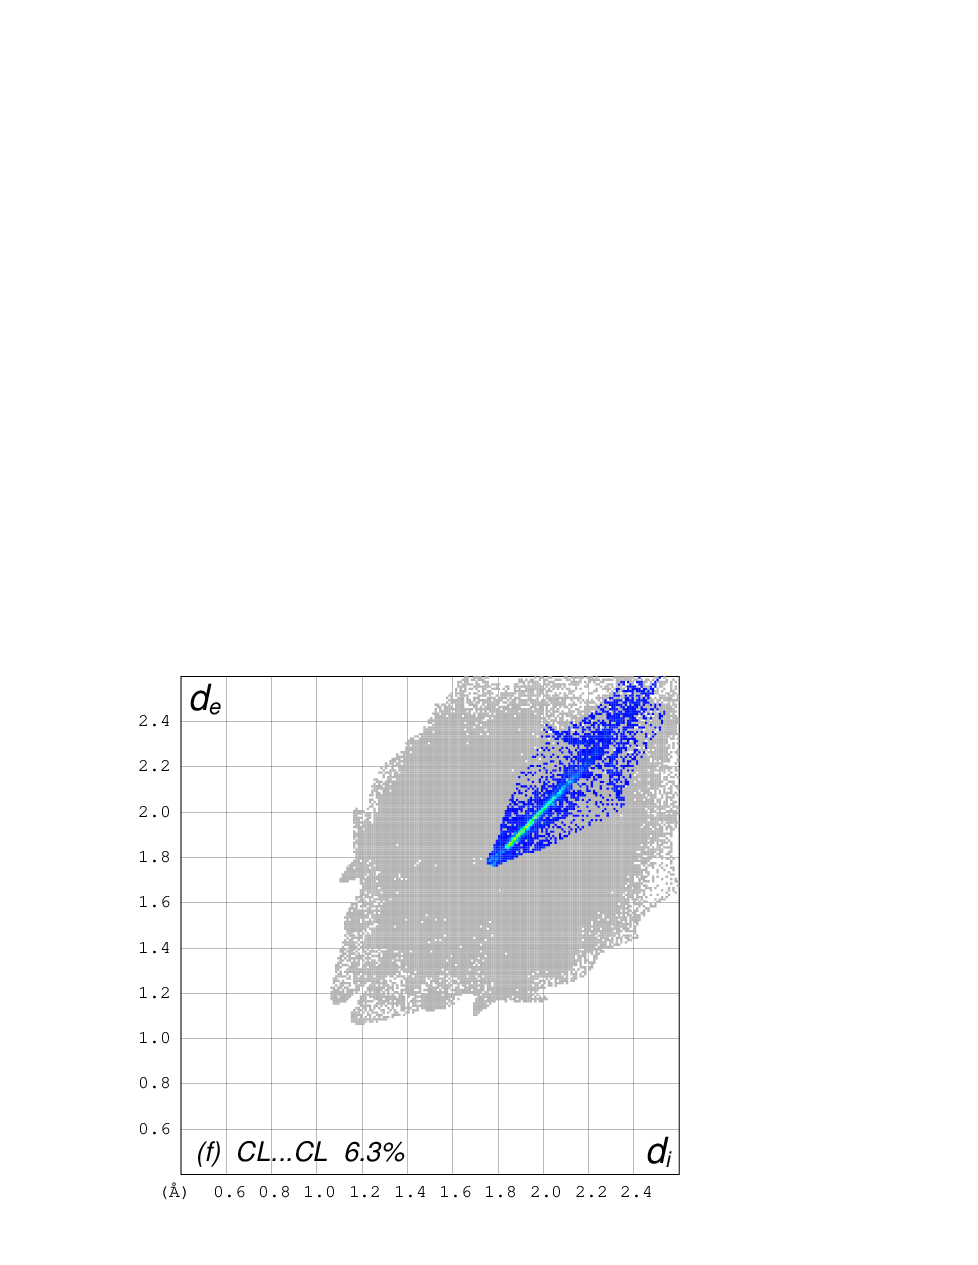

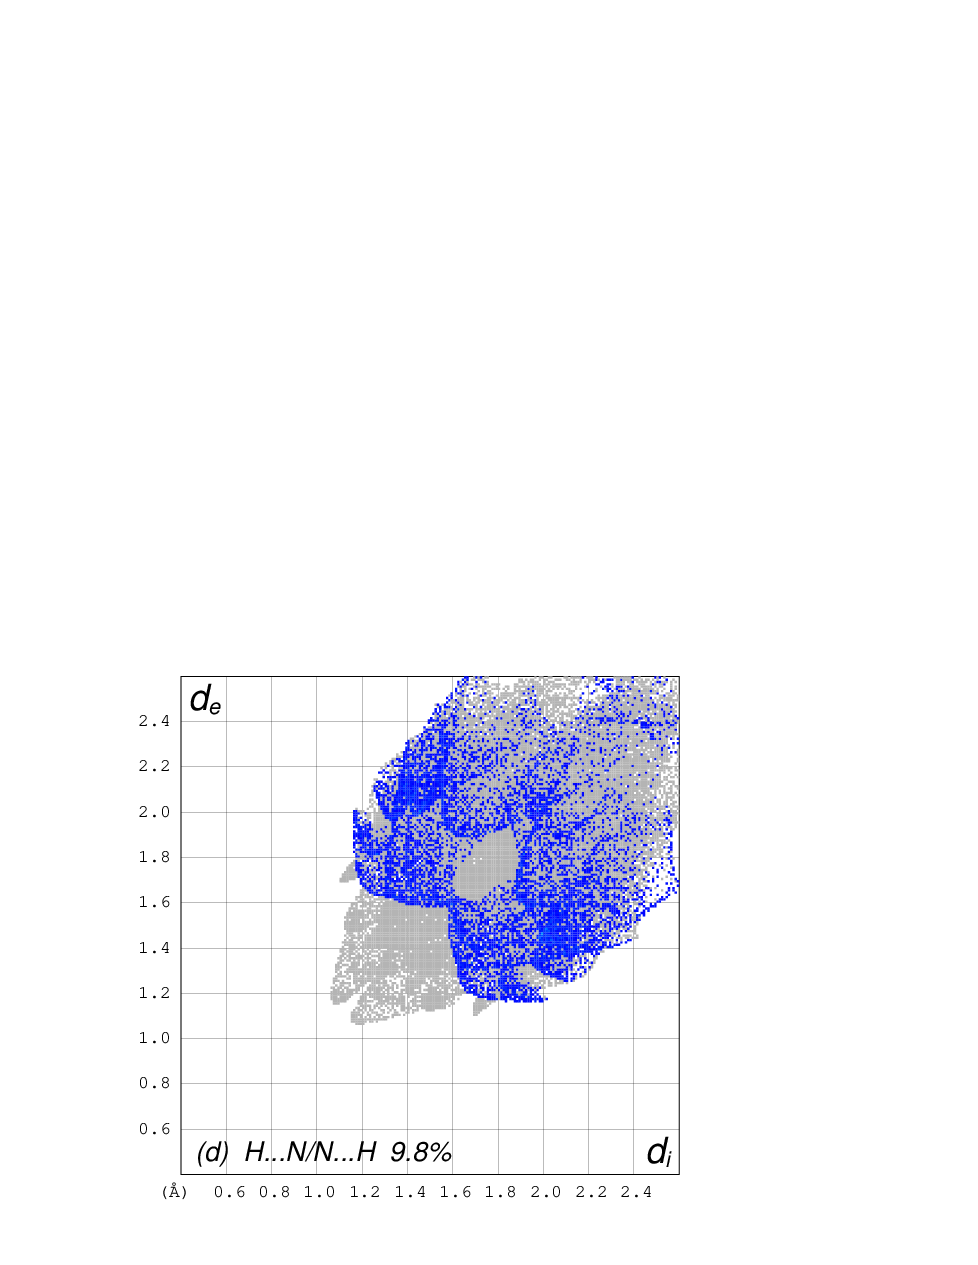

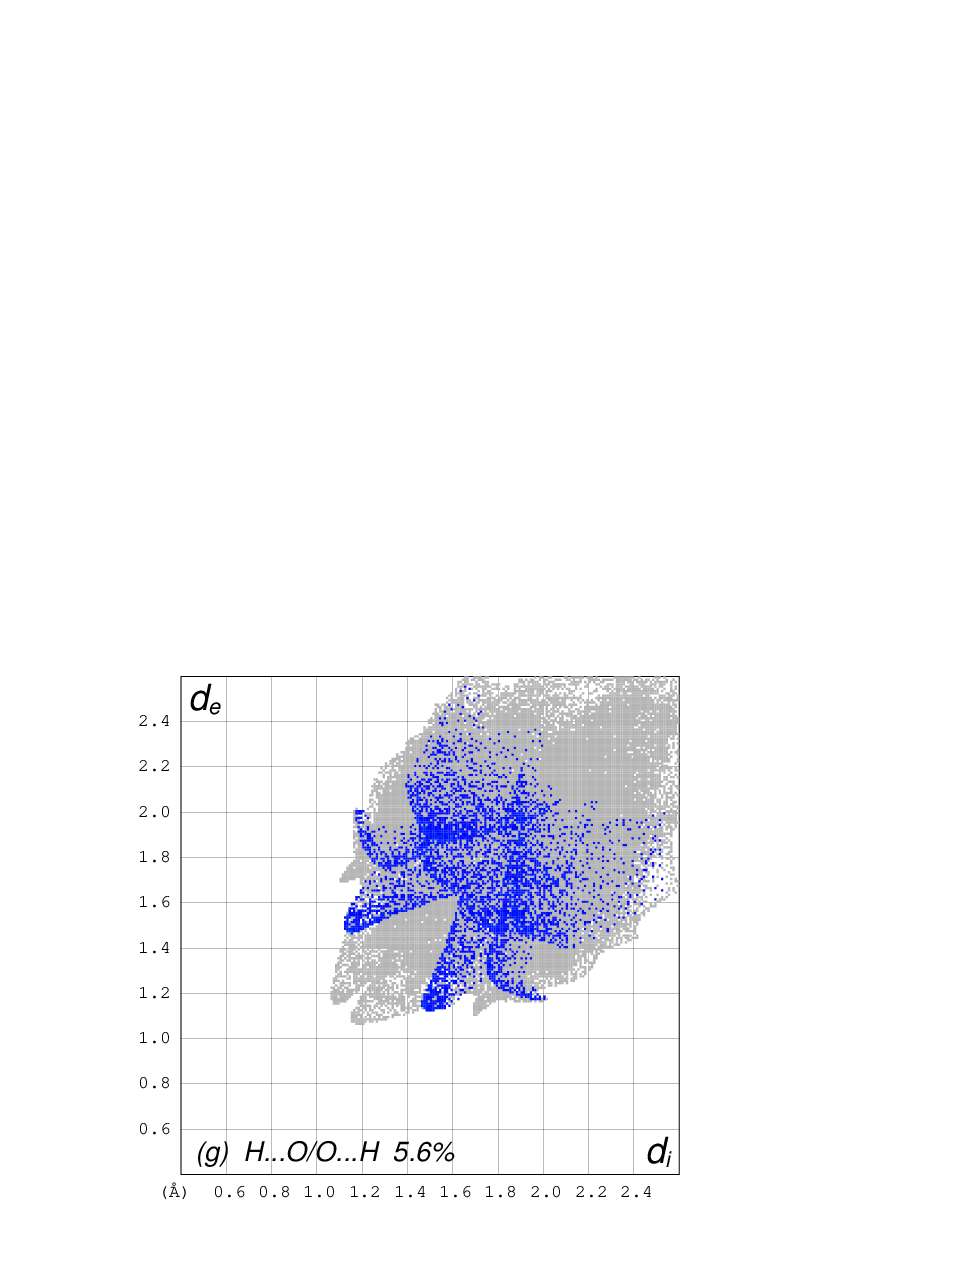

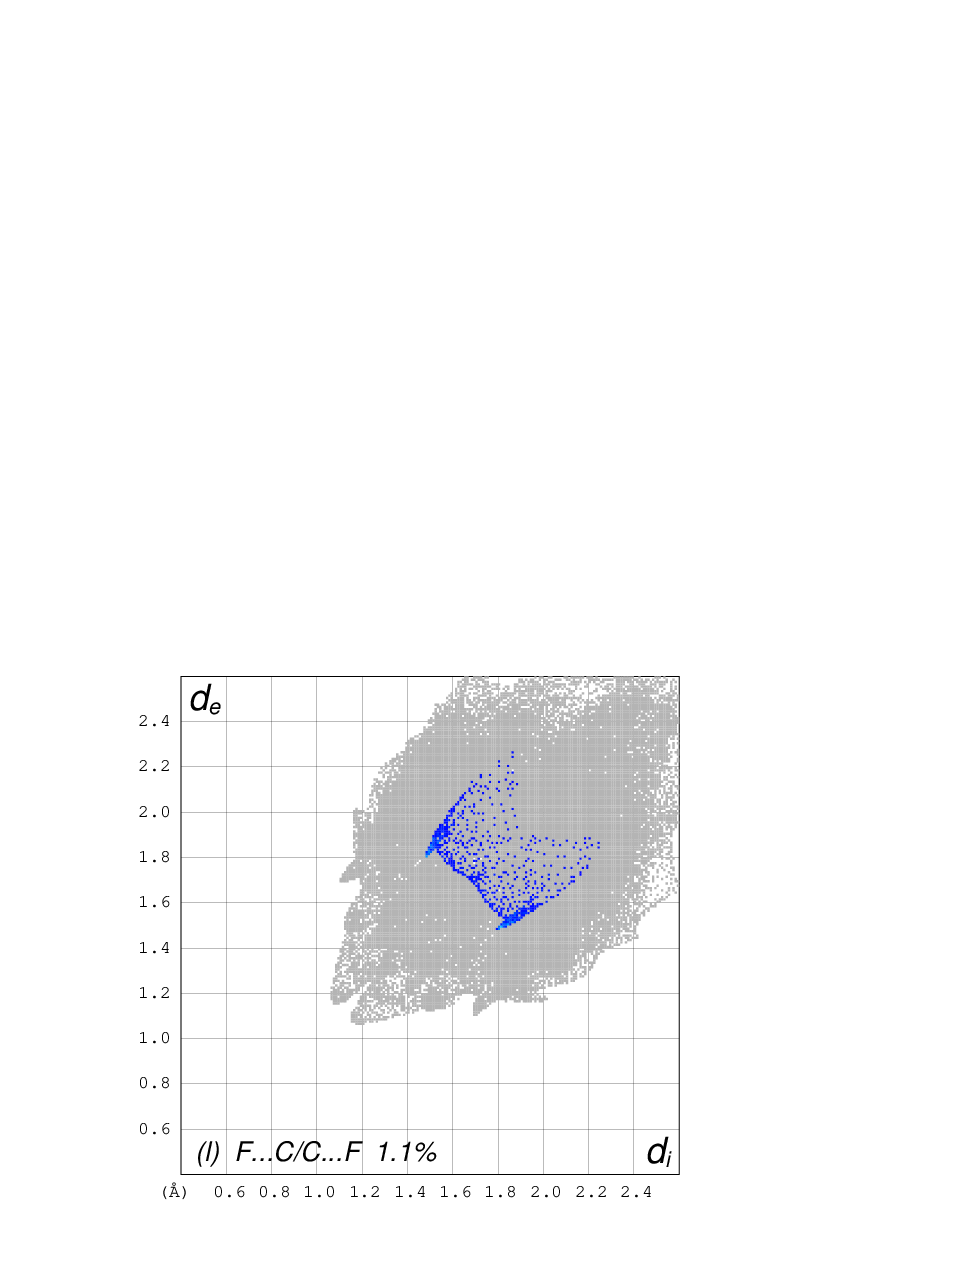

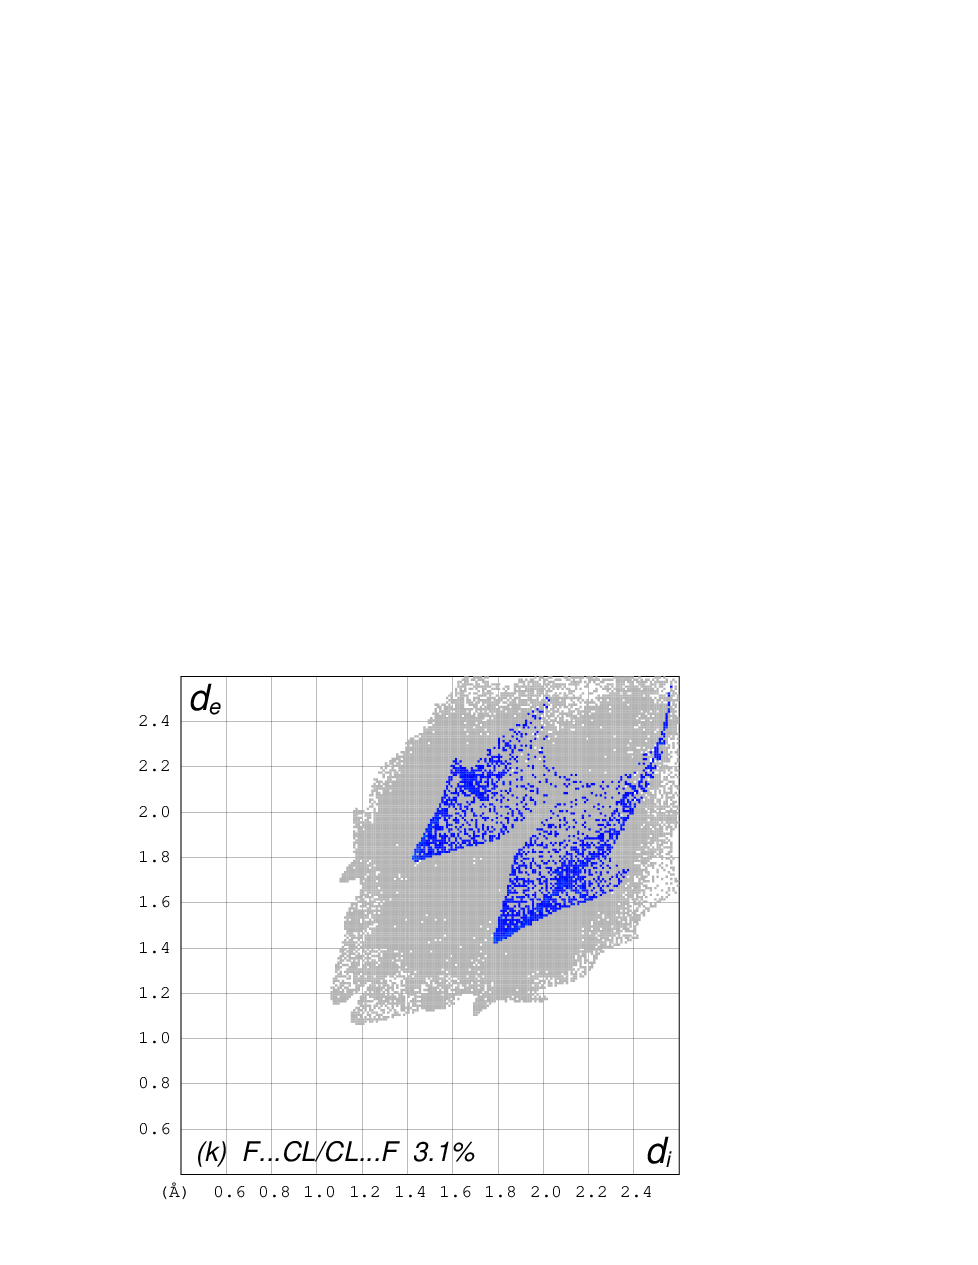

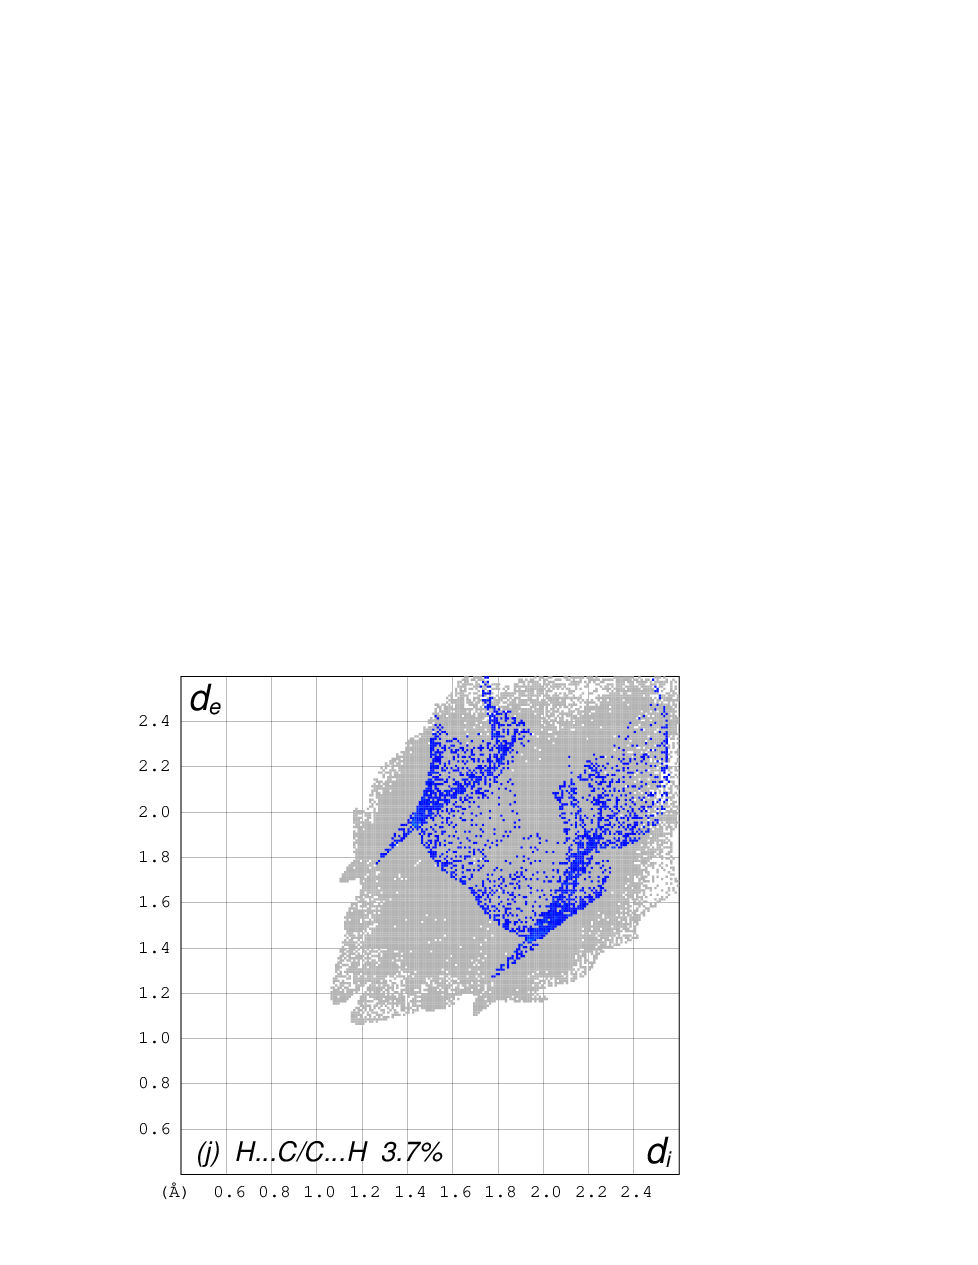

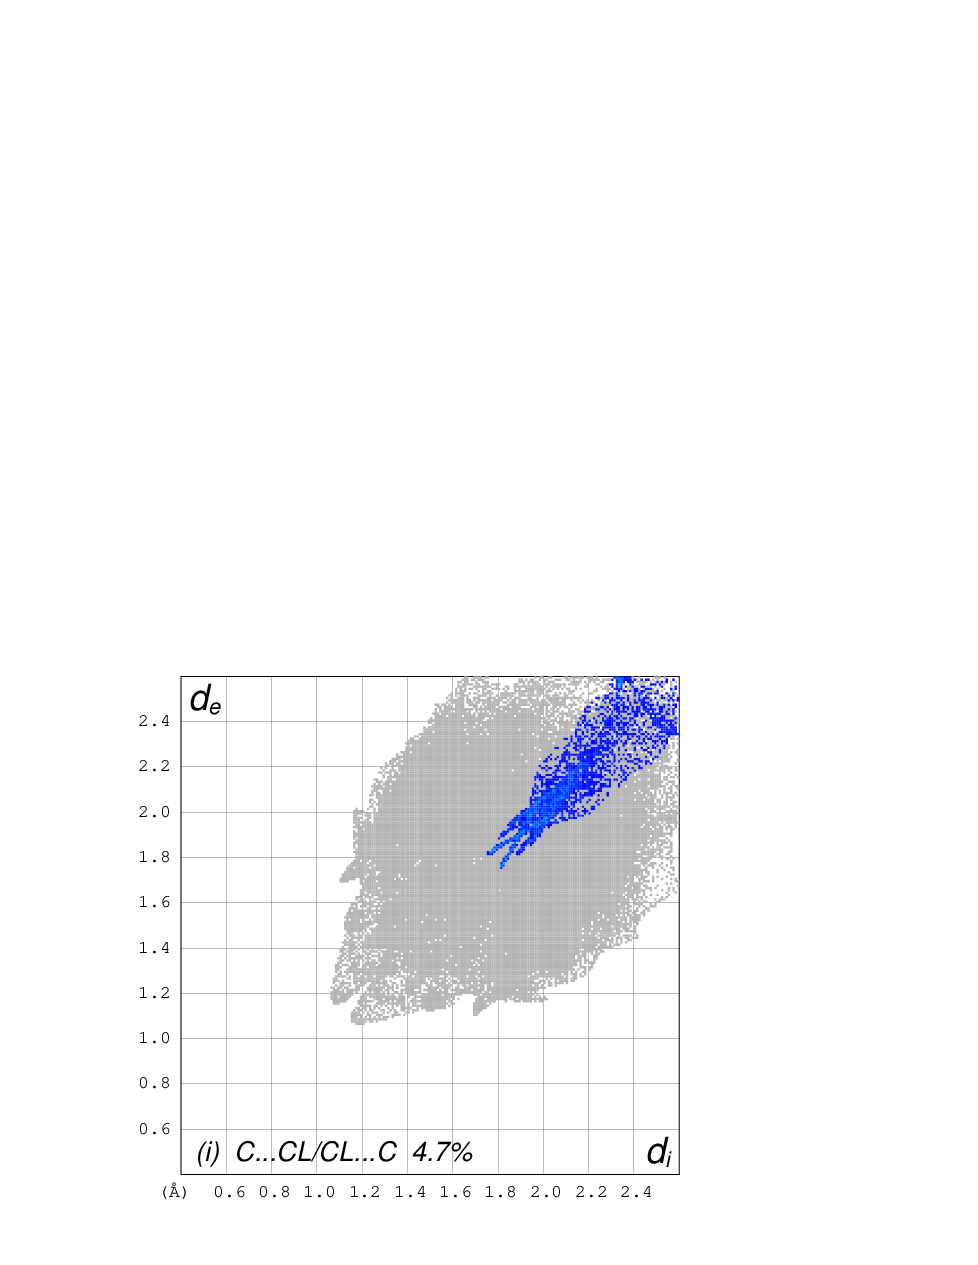

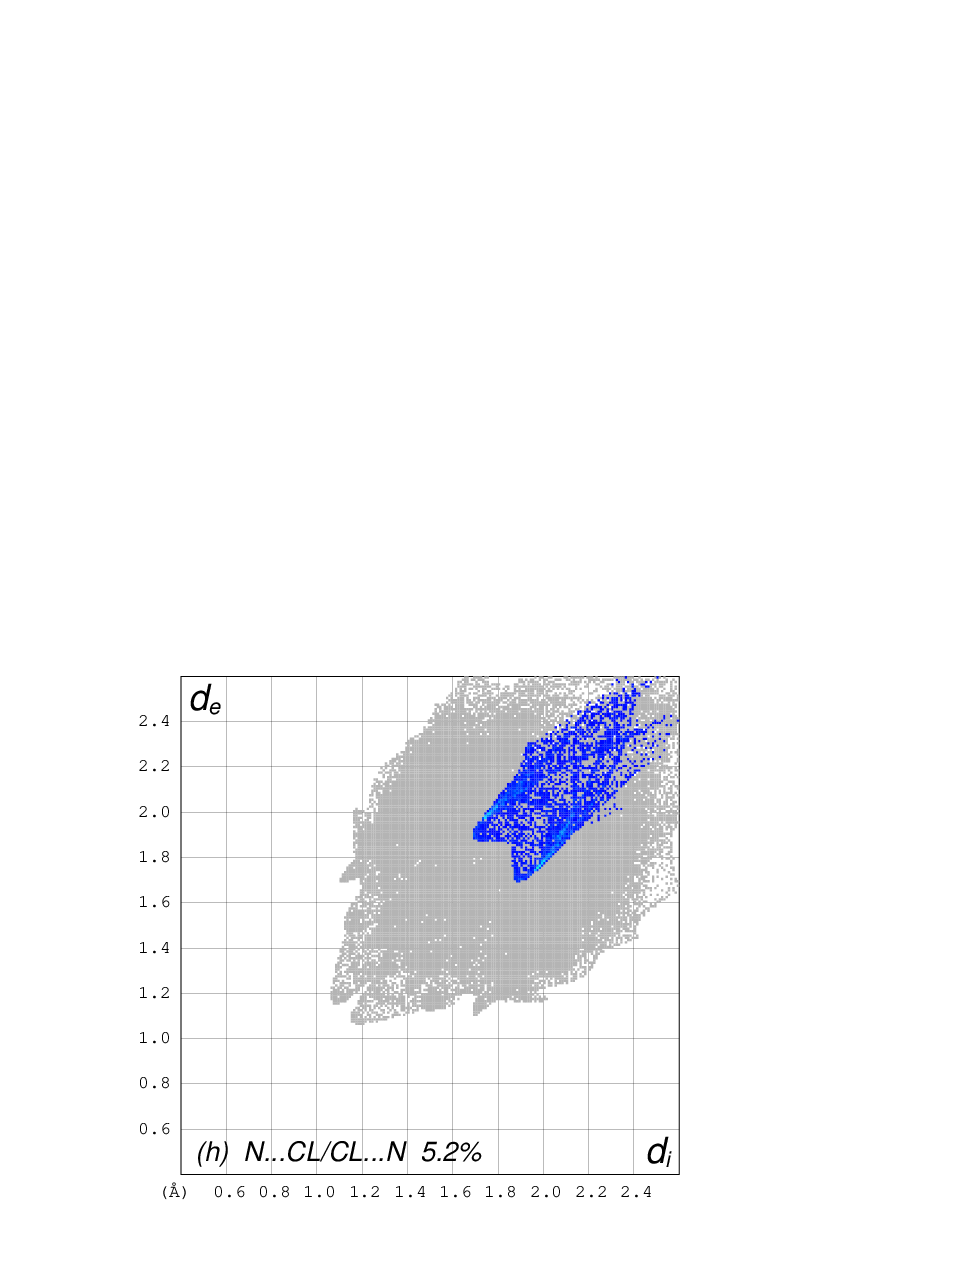

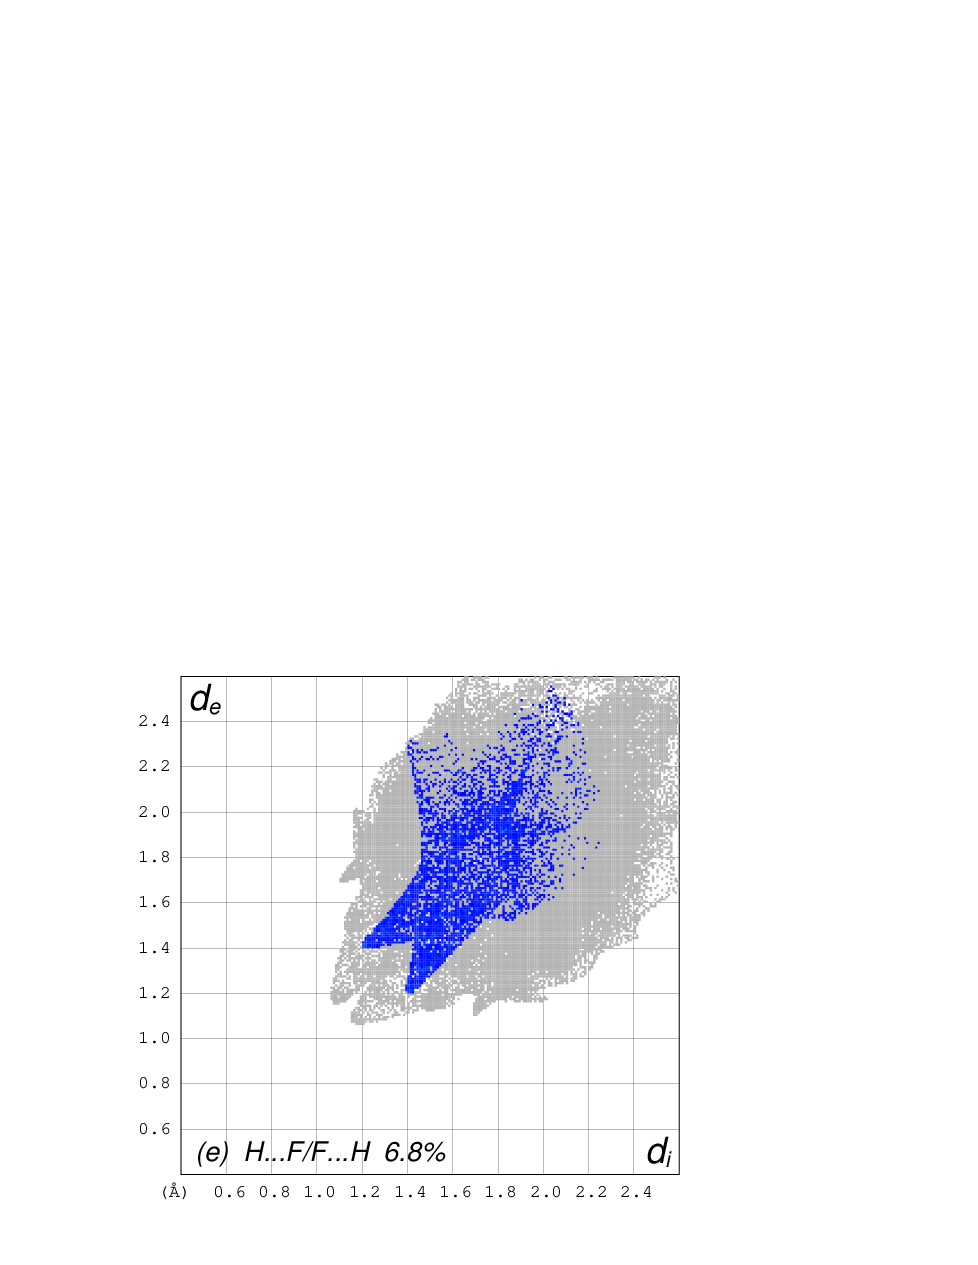

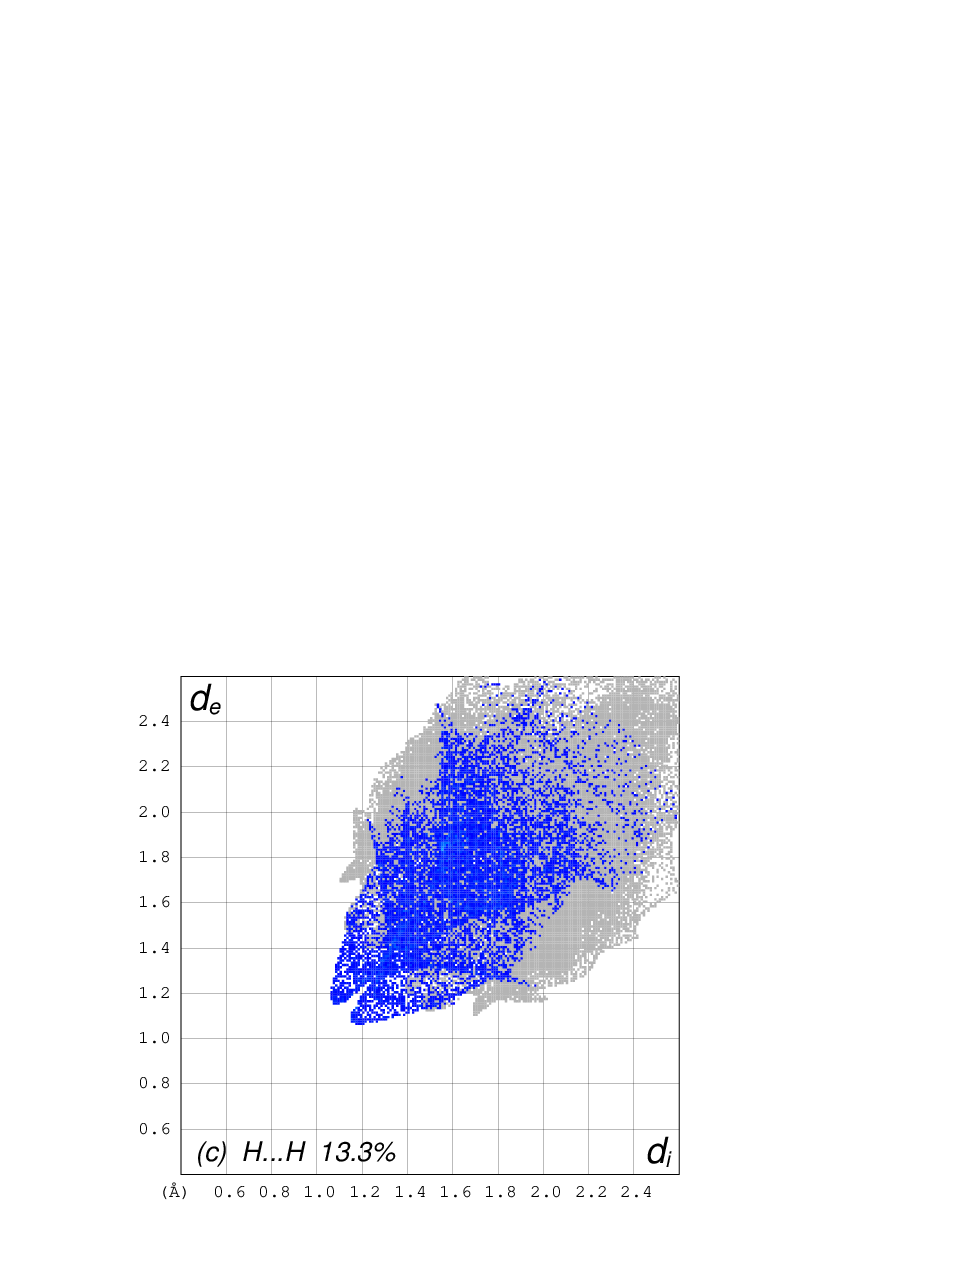

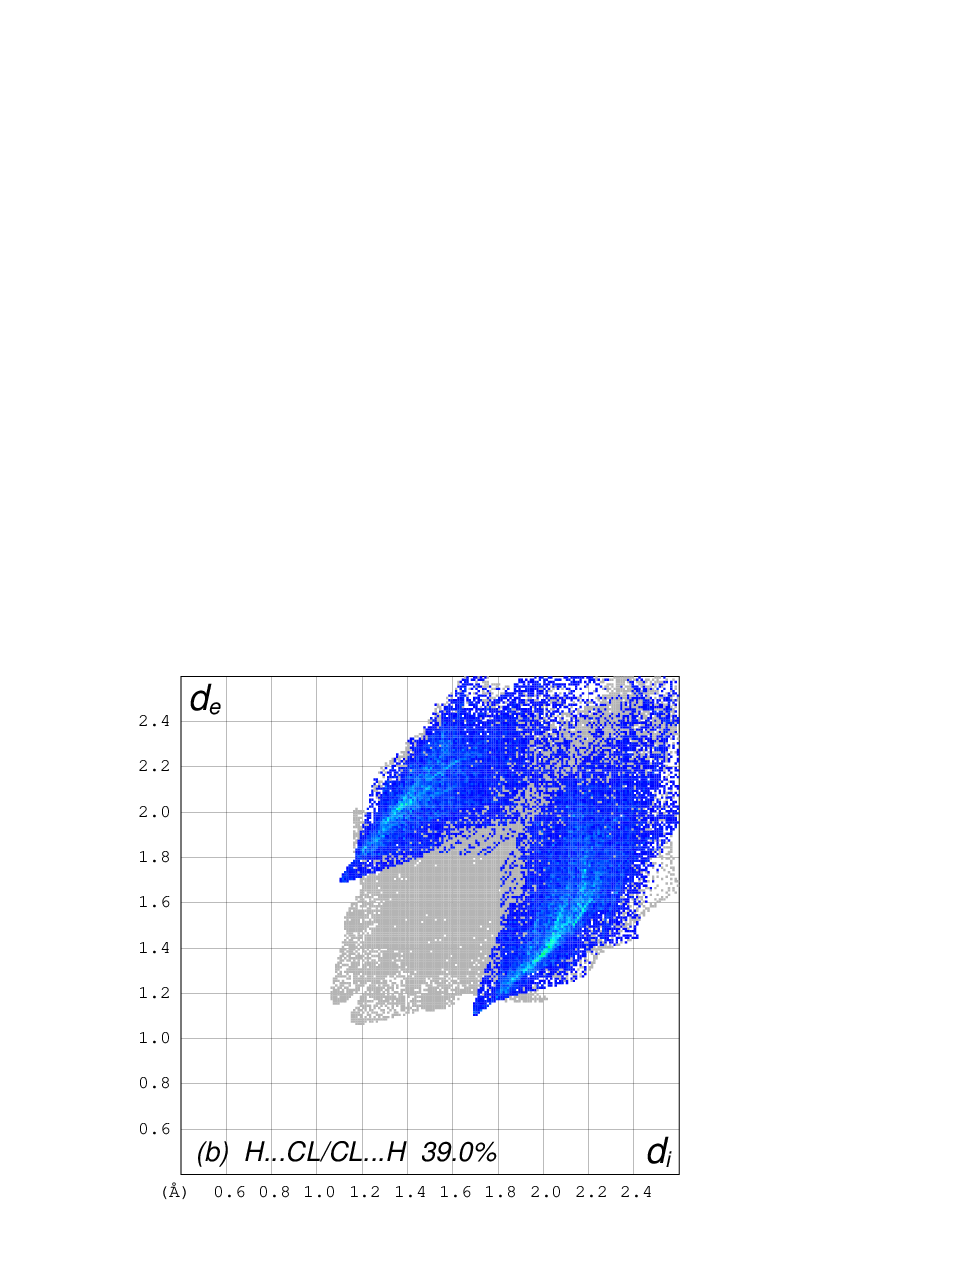

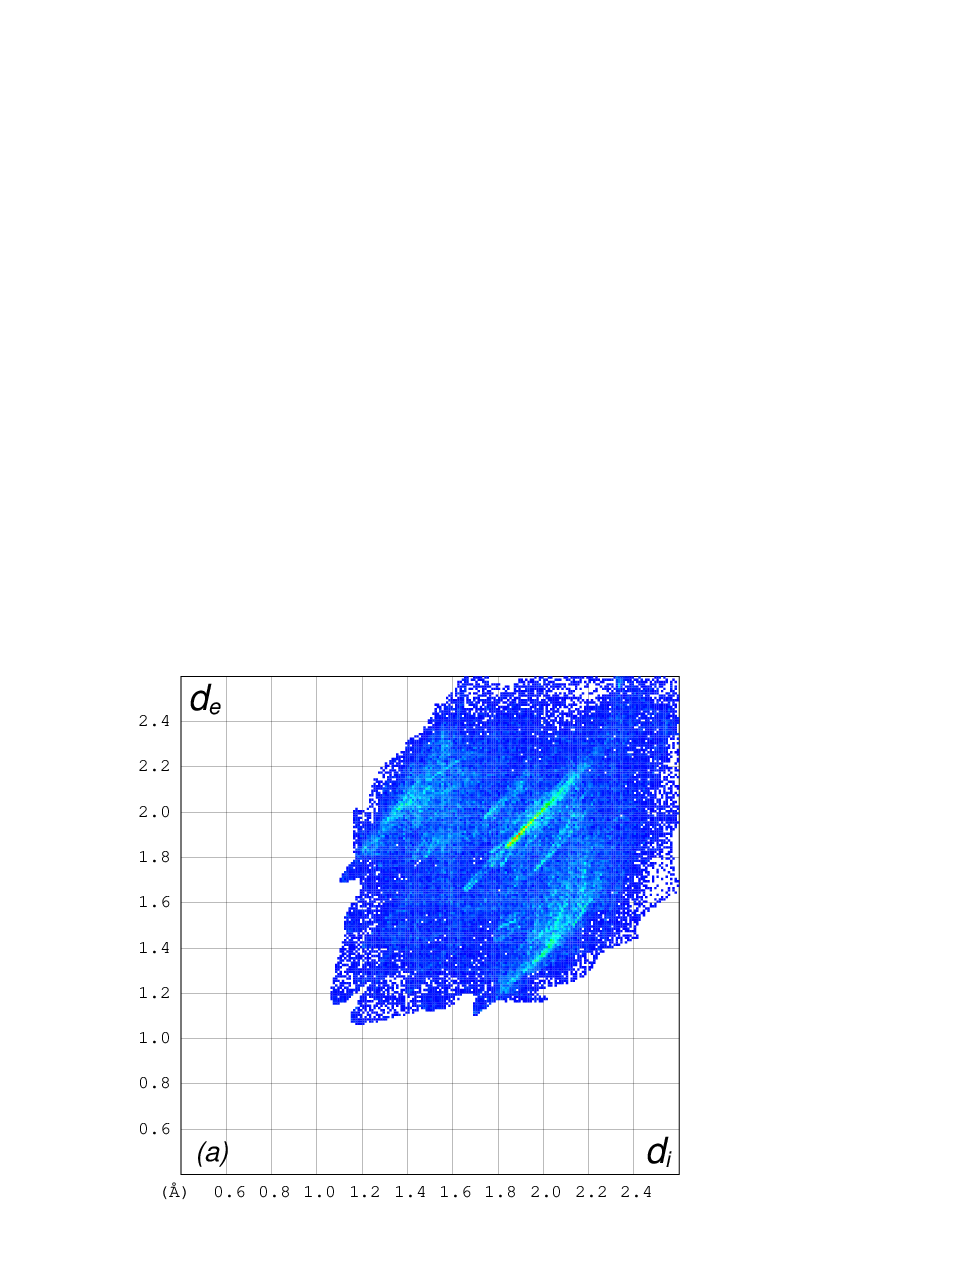


**Figure S4.** The full two-dimensional fingerprint plots for **2**, showing (a) all interactions, and delineated into (b) H ... Cl/Cl ... H, (c) H ... H, (d) H ... N/ N ... H, (e) H ... F/F ... H, (f) Cl ... Cl, (g) H ... O/O … H, (h) N ... Cl/Cl ... N, (i) C … Cl/Cl … C, (j) H … C/C … H, (k) F … Cl/Cl … F and (l) F … C/ C … F interactions. The di and de values are the closest internal and external distances (in Å) from given points on the Hirshfeld surface contacts.

**Figure S5.** The shapes of the phosphazene rings in **2** with torsion angles (deg) given.


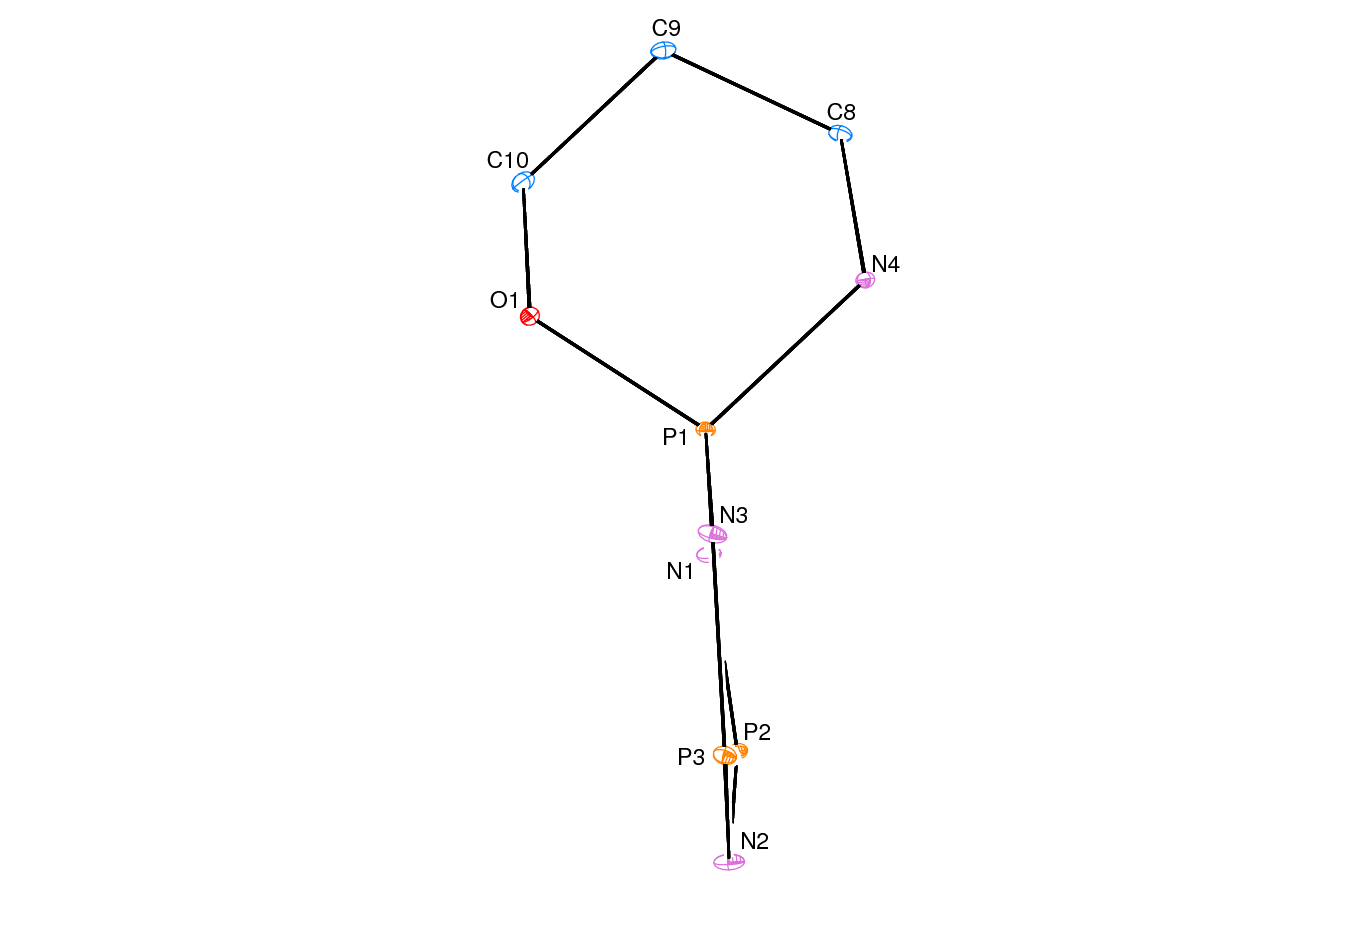


**(a)**


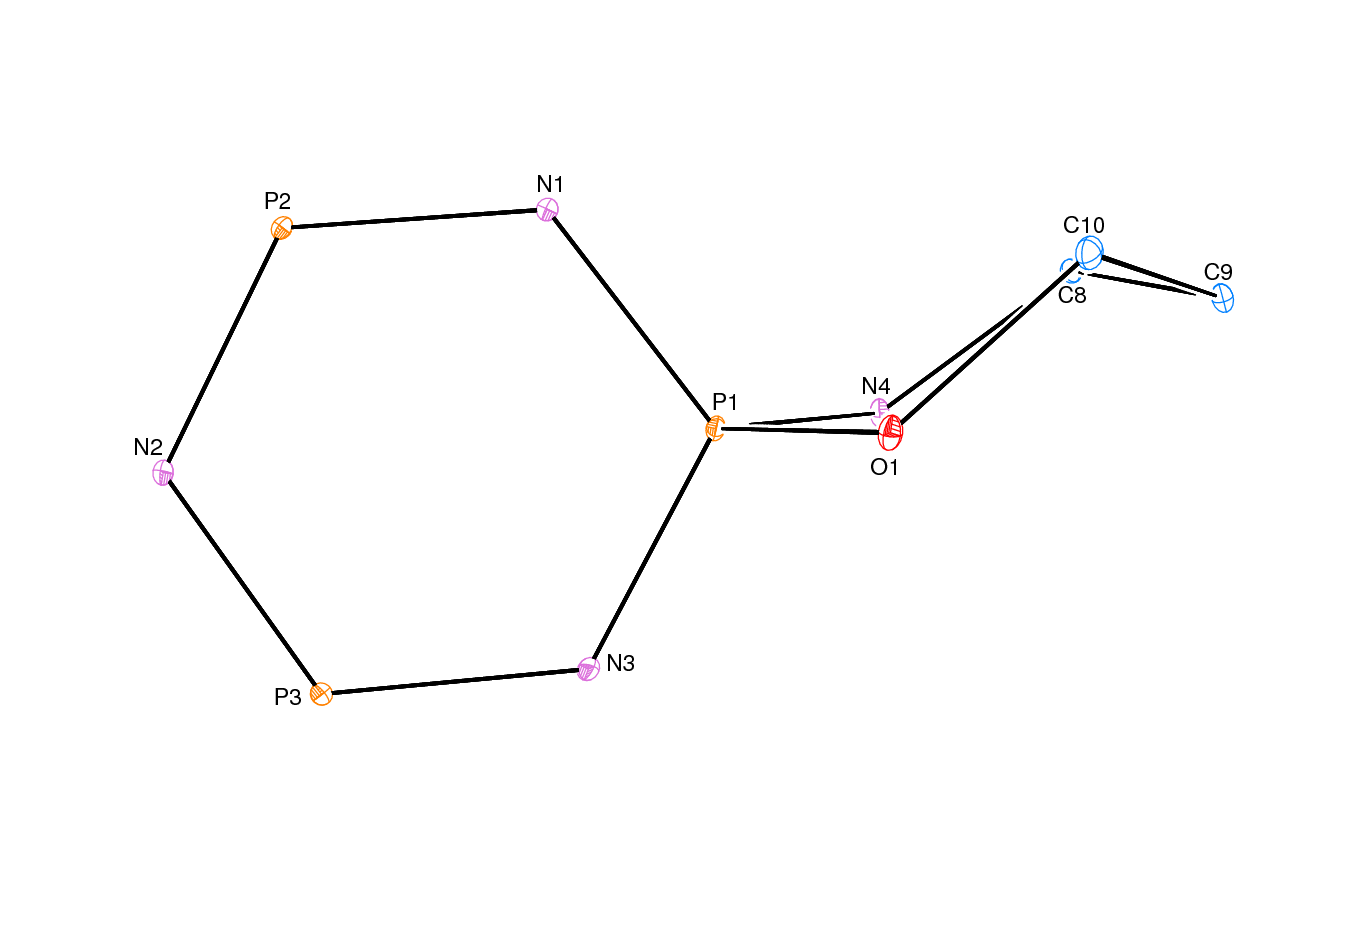


**(b)**

| **Figure S6.** The conformations of (**a**) the trimer ring and (**b**) the spiro ring of **2.** |
| --- |
|  |


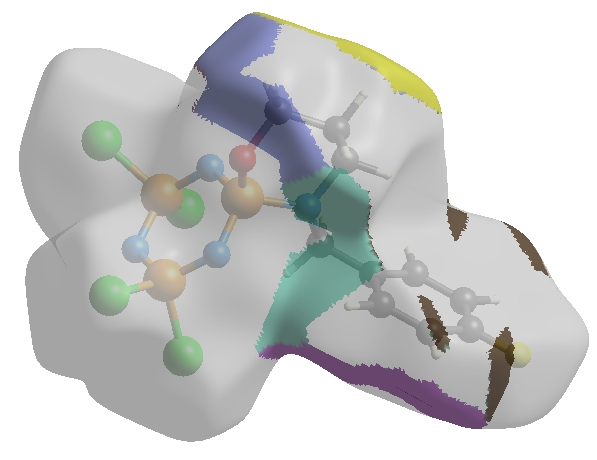

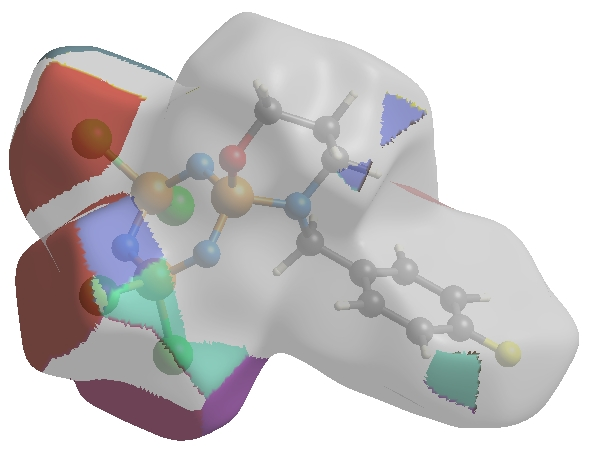


1. **(b)**


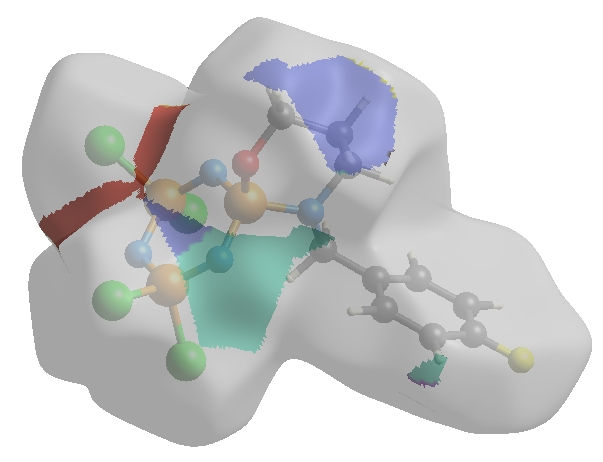


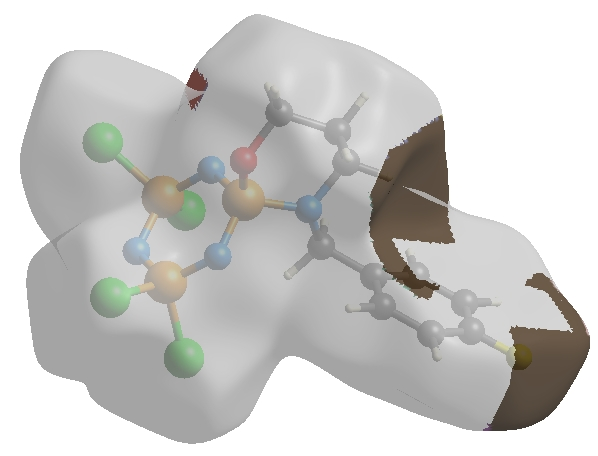


**(c)** **(d)**

**Figure S7.** The Hirshfeld surface representations with the function dnorm plotted onto the surface for **(a)** H ... Cl/Cl ... H, **(b)** H ... H, **(c)** H ... N/ N ... H and **(d)** H ... F/F ... H interactions.


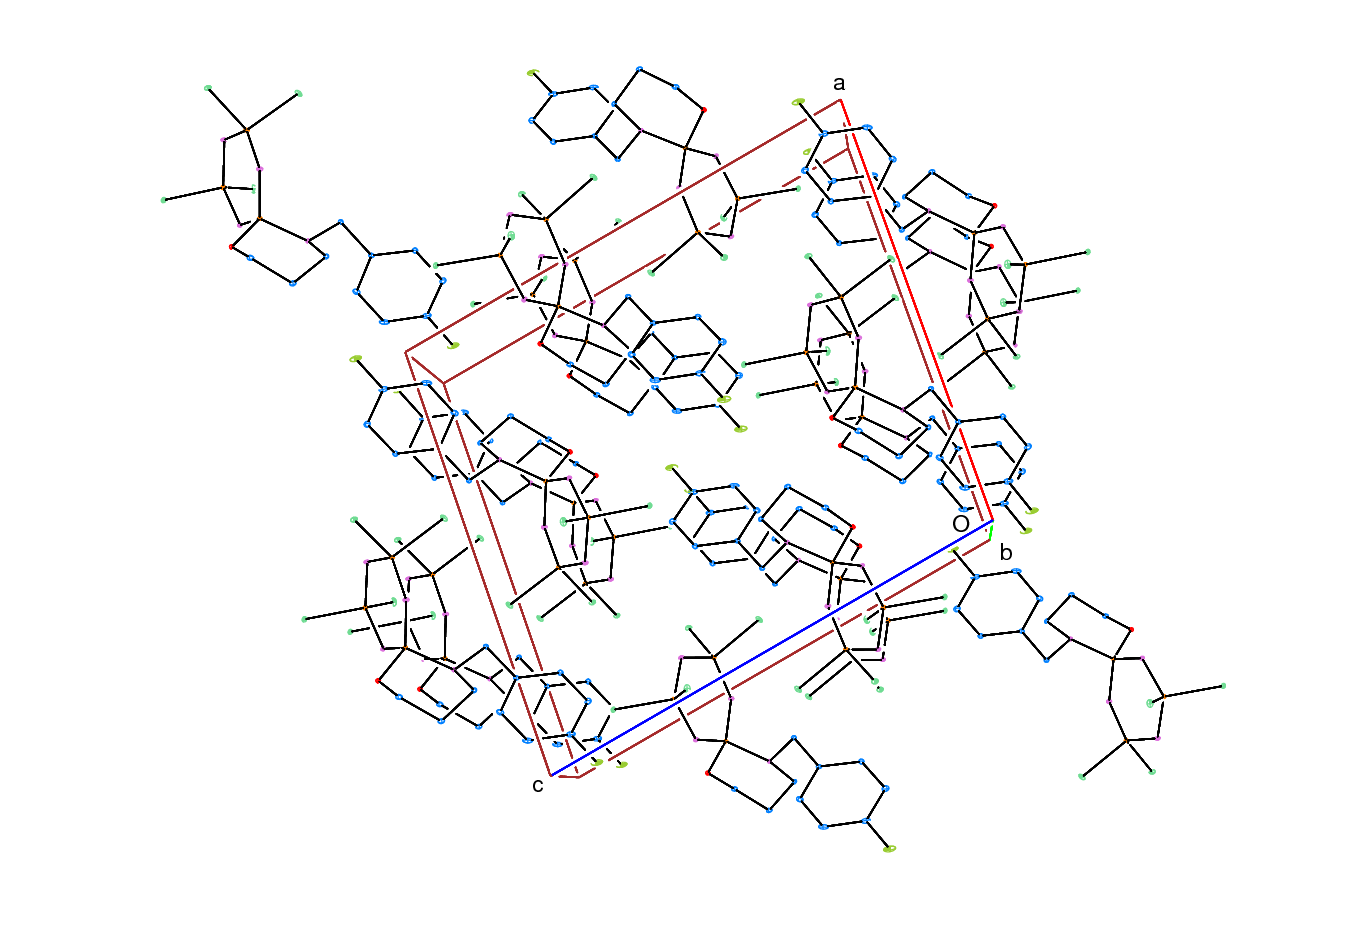


| **Figure S8.** The packing diagram of **2.** |
| --- |

**Figure S9.** Antiproliferative effects of phosphazenes (**2a-2d**) and 5-Fu (positive control) on PC3 cell lines at various concentrations (640–20 µM) and incubation times (24-48 h). All values are normalized to control untreated cells and presented as mean ± SD (n ≥ 3). Results were analyzed using ANOVA test; **** p ≤ 0.0001, *** p ≤ 0.0005, ** p ≤ 0.01, * p ≤ 0.05.

**Figure S10.** Antiproliferative effects of phosphazenes (**2a-2d**) and 5-Fu (positive control) on MCF7 cell lines at different concentrations (640–20 µM) and incubation times (24-48 h). All values are normalized to control untreated cells and presented as mean ± SD (n ≥ 3). Results were analyzed using ANOVA test; **** p ≤ 0.0001, *** p ≤ 0.0005, ** p ≤ 0.01, * p ≤ 0.05.

Figure S11. Antiproliferative effects of phosphazenes (2a-2d) and 5-Fu (positive control) on HT29 cell lines at different concentrations (640–20 µM) and incubation times (24-48 h). All values are normalized to control untreated cells and presented as mean ± SD (n ≥ 3). Results were analyzed using ANOVA test; **** p ≤ 0.0001, *** p ≤ 0.0005, ** p ≤ 0.01,* p ≤ 0.05.

**Figure S12.** Antimigrative effects of **2a-2d** on breast cancer cell lines (MCF7). Photographs were taken by Olympus Inverted Microscope (magnification is 4X) and processed by ImageJ image processing program.

**Figure S13.** Antimigrative effects of **2a-2d** on colon cancer cell lines (HT29). Photographs were taken by Olympus Inverted Microscope (magnification is 4X) and processed by ImageJ image processing program.
